# Supplementary material
Source: PubMed Central journal article supplement (PMC6764869)
Supplement: NIHMS1045784-supplement-Supplement_on_line.pdf [file NIHMS1045784-supplement-Supplement_on_line.pdf]

# SUPPORTING INFORMATION

## Single-molecule protein detection in a biofluid using a quantitative nanopore sensor

Avinash Kumar Thakur<sup>1,2</sup> and Liviu Movileanu<sup>1,2,3\*</sup>

<sup>1</sup>*Department of Physics, Syracuse University, 201 Physics Building, Syracuse, New York 13244-1130, USA*

<sup>2</sup>*Structural Biology, Biochemistry, and Biophysics Program, Syracuse University, 111 College Place, Syracuse, New York 13244-4100, USA*

<sup>3</sup>*Department of Biomedical and Chemical Engineering, Syracuse University, 329 Link Hall, Syracuse, New York 13244, USA*

**Keywords:** FhuA; Ion channel; Protein-protein Interface; Protein dynamics; Stochastic sensing; Electrophysiology; Membrane Protein Engineering.

\*The corresponding author's contact information:

Liviu Movileanu, PhD, Department of Physics, Syracuse University, 201 Physics Building, Syracuse, New York 13244-1130, USA. Phone: 315-443-8078; Fax: 315-443-9103; E-mail: [lmovilea@syr.edu](mailto:lmovilea@syr.edu)

**(i) Cloning and mutagenesis of the nanopore sensor and protein analyte.** All the genes were developed employing conventional and assembly PCR techniques. They were cloned into the pPR-IBA1 expression vector using respective restriction sites. *obn(ggs)<sub>2</sub>t-fhua* encoded the peptide adapter (O, MGDRGPEFELGT), fused at the N-terminus of barnase (Bn), a flexible glycine- and serine-rich hexapeptide tether, a truncated outer membrane protein (t-FhuA), and *KpnI* sites at both ends.<sup>1</sup> This gene was created using the *bn* and *t-fhua* genes and assembly PCR reactions. The *bn* gene encoded an H102A mutant, because this lacks RNase activity<sup>2, 3</sup>. Fortuitously, this mutation also converts the non-equilibrium, permanent Bn-Bs interaction into an equilibrium, transient interaction.<sup>3</sup> In this way, OBn(GGS)<sub>2</sub>FhuA proteins were not toxic to the expression host. The *bs* gene, which encoded the protein analyte, barstar (Bs), featured a double-alanine mutant, C40A/C82A.<sup>4</sup>

**(ii) Protein expression and purification.** All genes were transformed into *E. coli* BL21(DE3) cells for protein expression. OBn(GGS)<sub>2</sub>t-FhuA was expressed and purified, as previously reported.<sup>5</sup> For the protein analyte, Bs, transformed cells were grown in Luria-Bertani medium at 37°C until OD<sub>600</sub> reached a value of ~0.5, after which the temperature was changed to 20°C.<sup>1</sup> After induction in the presence of IPTG, the cells were further cultured for an additional period of ~18 hours at the same temperature. The cells were then centrifuged at 3,700×g for 30 min at 4°C, followed by their resuspension in 150 mM KCl, 50 mM Tris-HCl, 5 mM EDTA, pH 8. A Model 110L microfluidizer (Microfluidics, Newton, MA) was used for achieving the cell lysis. To separate the insoluble pellet and supernatant, the lysates were centrifuged at 108,500 × g for 30 min at 4°C to separate. The supernatant was further processed for ammonium sulfate precipitation. Then, the supernatant was dialyzed against 20 mM Tris-HCl, pH 8, overnight at 4°C and purified on a Q-Sepharose column (Bio-Rad, Hercules, CA) using a linear salt gradient of 0 - 0.5 M KCl, 20 mM Tris-HCl, pH 8. A refining purification step was conducted by passing pure protein fractions through a Superdex-75 size-exclusion column (SEC; GE Healthcare Life Sciences, Pittsburg, PA).

**(iii) Membrane protein refolding.** Lyophilized protein samples of OBn(GGS)<sub>2</sub>t-FhuA were solubilized in 200 mM KCl, 8 M urea, 50 mM Tris-HCl, pH 8 to a final concentration of ~15 μM. Solubilized protein samples were then incubated at room temperature for several hours. n-dodecyl-β-D-maltopyranoside (DDM) was added to denatured samples to a final concentration of 1.5% (w/v). Thereafter, a slow dialysis of protein samples was conducted against the buffer containing 200 mM KCl, 20 mM Tris-HCl, pH 8, at 4 °C for at least 72 h. For single-channel electrical recordings, the protein samples were 20-fold diluted in 200 mM KCl, 20 mM Tris-HCl, pH 8, 0.5% DDM. Protein concentrations were assessed using their molar absorptivity at a wavelength of 280 nm.

**(iv) Single-molecule electrophysiology using planar lipid bilayers.** Single-channel electrical recordings were conducted using synthetic planar lipid bilayers, as previously published.<sup>6, 7</sup> The protein sample was added to the *cis* side of the chamber (**Fig. 1a**), which was at ground, at a final concentration in a range between 0.3 and 1 ng/μl. The acquisition of single-channel currents was achieved using an Axopatch 200B patch-clamp amplifier (Axon Instruments, Foster City, CA). In all experiments, the electrolyte solution included 300 mM KCl, 10 mM Tris-HCl, pH 8. All single-channel recordings were executed at a temperature of 23 ± 1°C. Statistically significant fit model was determined by using a

standard logarithm likelihood ratio (LLR) test.<sup>8</sup> At a confidence level  $C = 0.95$ , the best model was one-exponential fit, unless otherwise stated (see terms resulting from serum constituents). Fetal bovine serum (FBS; Gibco™, catalog number A3160601), was purchased from Fisher Scientific (Pittsburg, PA). FBS was filtered using an 0.2- $\mu\text{m}$  filter, then kept in aliquots at  $-80^{\circ}\text{C}$ . In this work, we used a maximum concentration of 5% (v/v) FBS, because the lipid bilayer was stable under these conditions for long recording periods. The total nontarget protein content in FBS was in the range of 30-50 mg/ml (provided by Gibco™). Therefore, the maximum FBS protein concentration for analyzing single-molecule Bs detection was in the range 1.5-2.5 mg/ml. For single-channel electrical recordings, each frozen FBS aliquot was first thawed at  $4^{\circ}\text{C}$ , then incubated at room temperature for at least 30 min. Heat-inactivated fetal bovine serum (HI-FBS) was prepared by incubating the FBS in  $56^{\circ}\text{C}$  water bath for 30 min. The HI-FBS was then allowed to cool down slowly at room temperature for 15 min before being aliquoted and stored at  $-20^{\circ}\text{C}$ .<sup>9,10</sup>

(v) Control single-channel electrical trace of the  $\text{OBn}(\text{GGS})_2\text{t-FhuA}$  protein pore at  $-40$  mV.

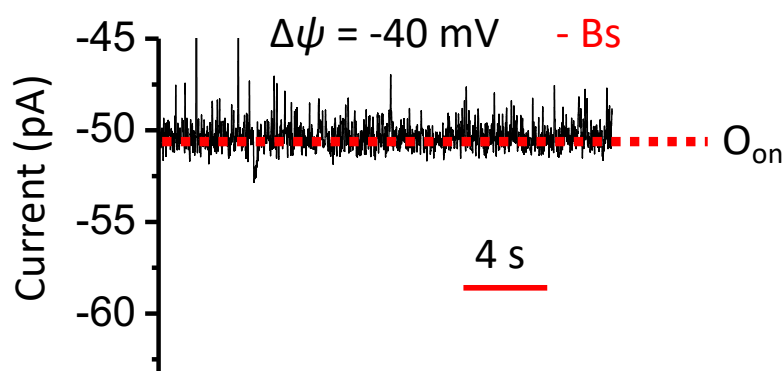

**Figure S1: Representative single-channel electrical recording of  $\text{OBn}(\text{GGS})_2\text{t-FhuA}$  in the absence of Bs and at an applied transmembrane potential  $-40$  mV.** Single-channel electrical trace was further low-pass, 8-pole Bessel filtered at 20 Hz. This single-channel electrical signature was replicated in  $n = 3$  independent experiments. The other experimental conditions were the same as those stated in the main text.

(vi) Standard histograms of the Bs capture and release events at -40 mV.

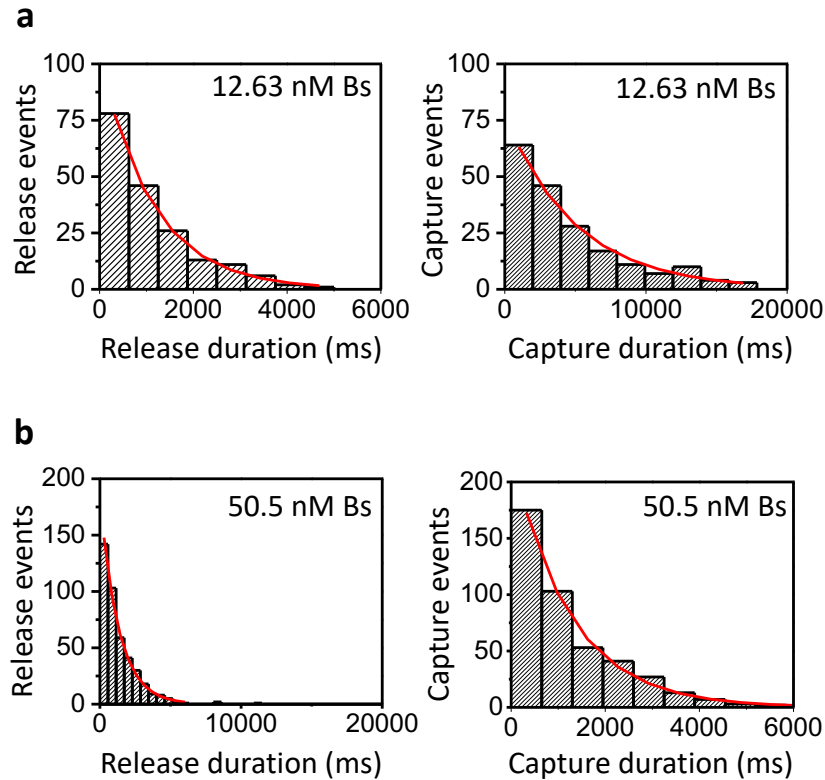

**Figure S2: Standard capture and release event histograms in a homogeneous solution.**

(a) Representative standard histograms of the release ( $\tau_{on}$ ; left) and capture ( $\tau_{off}$ ; right) durations at 12.63 nM Bs. The  $\tau_{on}$  and  $\tau_{off}$  values obtained from the fits, in the form of mean  $\pm$  s.e.m., were  $5,053 \pm 286$  ms (number of events:  $n = 191$ ) and  $1,128 \pm 35$  ms ( $n = 184$ ), respectively. (b) Representative standard histograms of the release ( $\tau_{on}$ ; left) and capture ( $\tau_{off}$ ; right) durations at 50.5 nM Bs. The  $\tau_{on}$  and  $\tau_{off}$  values obtained from the fits, in the form of mean  $\pm$  s.e.m., were  $1,312 \pm 50$  ms (number of events:  $n = 420$ ) and  $1,236 \pm 45$  ms ( $n = 427$ ), respectively. The applied transmembrane potential was  $-40$  mV. The other experimental conditions were stated in the caption of Fig. 1b.

(vii) FBS constituents produced long-lived current blockades at a high negative potential.

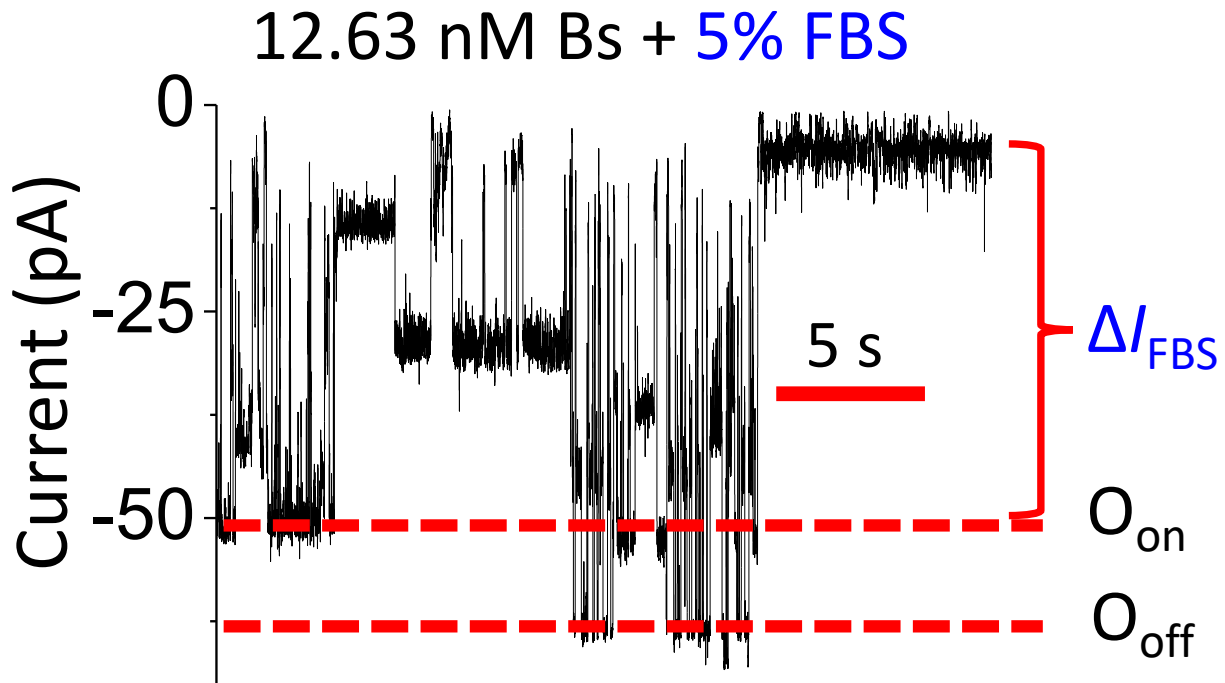

**Figure S3:** Fetal bovine serum (FBS) causes very long-lived current blockades at an applied transmembrane potential of  $-40$  mV. This figure illustrates a representative single-channel electrical measurement of  $\text{OBn}(\text{GGs})_2\text{-FhuA}$  when  $50.5$  nM Bs was added to the *cis* side. The transmembrane potential was  $-40$  mV. The buffer solution in *cis* side also contained 5% (v/v) FBS. This single-channel electrical signature was replicated in two independent experiments. All recordings were performed in 300 mM KCl, 10 mM Tris·HCl pH 8, and at a temperature of  $23 \pm 1^\circ\text{C}$ .

(viii) Voltage dependence of the differential current.

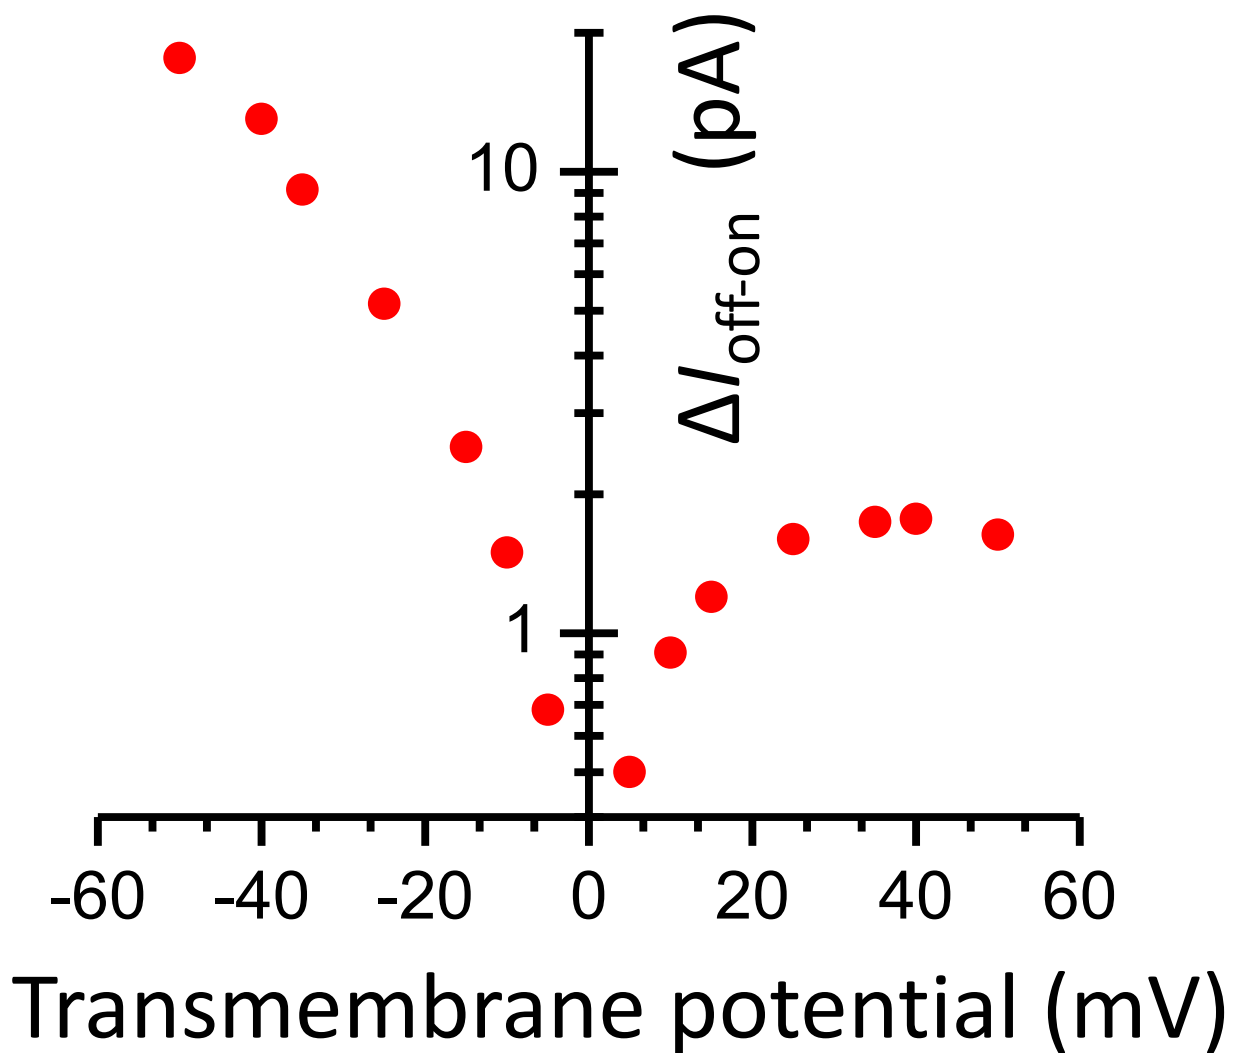

**Figure S4:** The current-voltage scatter plot of the differential current,  $\Delta I_{\text{off-on}}$ . This data was recorded using OBn(GGS)<sub>2</sub>t-FhuA in the presence of 100.9 nM Bs.  $\Delta I_{\text{off-on}}$  is the absolute current difference between the Bs-free ( $O_{\text{on}}$ ) and Bs-bound ( $O_{\text{off}}$ ) open substates. The other experimental conditions were the same as those stated in the main text in **Fig. 1b**. This plot resulted from data acquisition of a single experiment.

(ix) The SNR of the  $O_{on}$  and  $O_{off}$  substates is improved at an applied transmembrane potential of +15 mV.

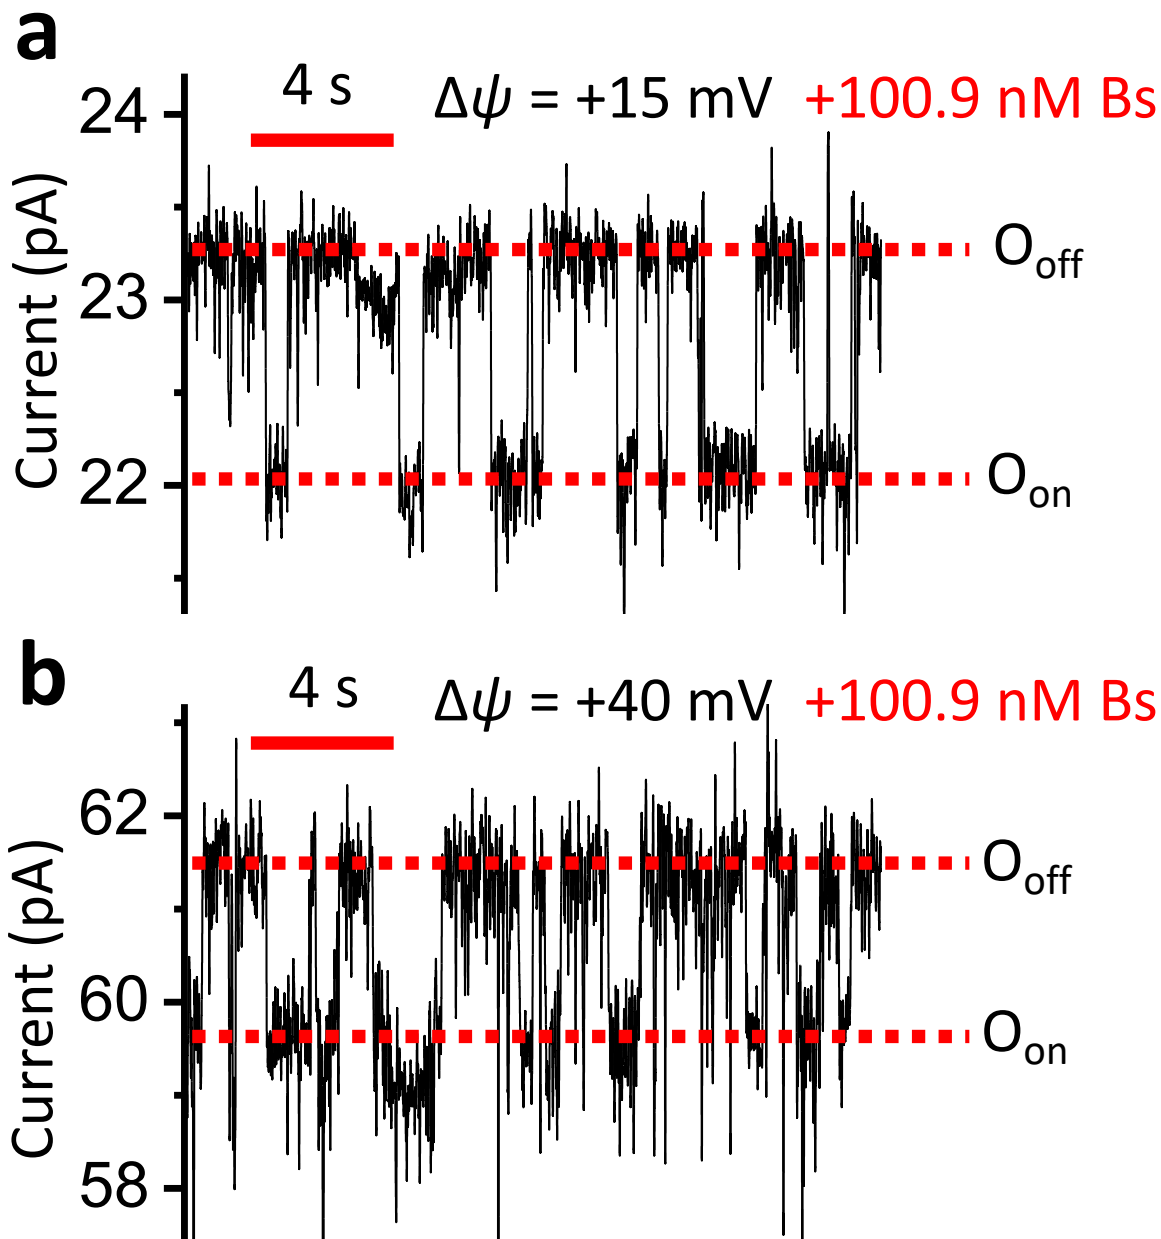

**Figure S5: Qualitative comparison of signal-to-noise of single-channel electrical recordings of OBn(GGS)<sub>2</sub>t-FhuA in the presence of 100.9 nM Bs and at applied transmembrane potentials of +15 mV (a) and +40 mV (b).** Both single-channel electrical traces were further low-pass, 8-pole Bessel filtered at 20 Hz. Single-channel electrical signatures shown in (a) and (b) were replicated in  $n = 3$  independent experiments. The other experimental conditions were the same as those stated in the main text in Fig. 1b.

(x) Control single-channel electrical trace of the OBn(GGS)<sub>2</sub>t-FhuA protein pore at +15 mV.

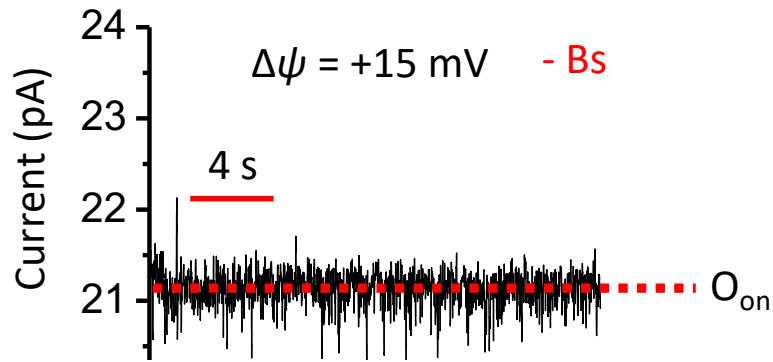

**Figure S6: Representative single-channel electrical recording of OBn(GGS)<sub>2</sub>t-FhuA in the absence of Bs and at an applied transmembrane potential of +15 mV.** Single-channel electrical trace was further low-pass, 8-pole Bessel filtered at 20 Hz. This single-channel electrical signature was replicated in  $n = 3$  independent experiments. The other experimental conditions were the same as those stated in the main text in **Fig. 1b**.

(xi) Standard histograms of the Bs capture and release events at +15 mV.

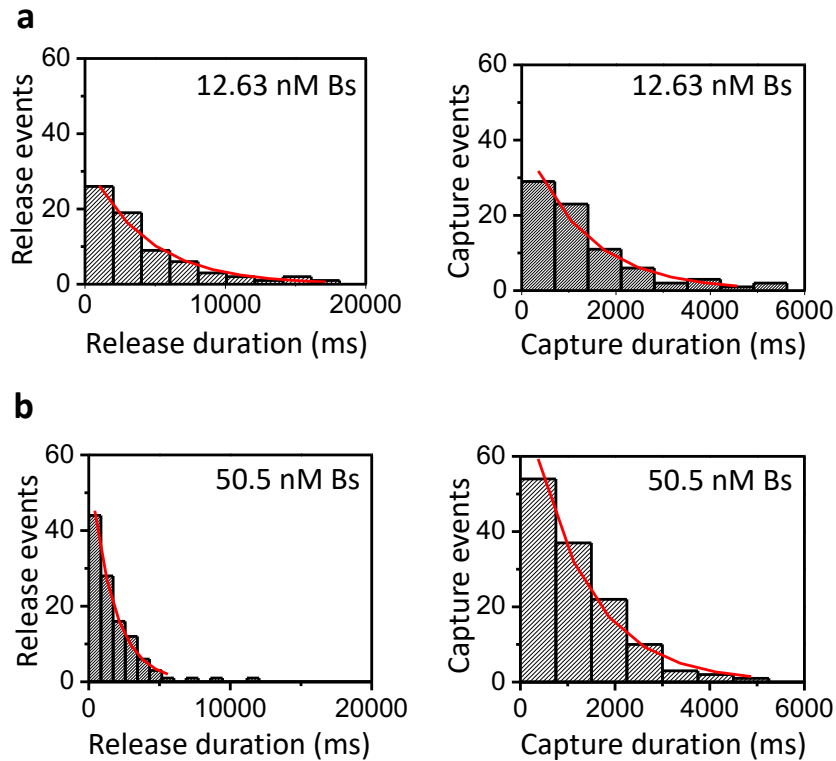

**Figure S7: Representative release and capture event histograms.** (a) Representative standard histograms of the release ( $\tau_{\text{on}}$ ; left) and capture ( $\tau_{\text{off}}$ ; right) durations of the Bs reversible captures at 12.63 nM Bs. The  $\tau_{\text{on}}$  and  $\tau_{\text{off}}$  values obtained from the fits, in the form of mean  $\pm$  s.e.m., were  $4,244 \pm 316$  ms (number of events:  $n = 70$ ) and  $1,292 \pm 163$  ms ( $n = 77$ ), respectively. (b) Representative



standard histograms of the release ( $\tau_{\text{on}}$ ; left) and capture ( $\tau_{\text{off}}$ ; right) durations at 50.5 nM Bs. The  $\tau_{\text{on}}$  and  $\tau_{\text{off}}$  values obtained from the fits, in the form of mean  $\pm$  s.e.m., were  $1,657 \pm 81$  ms (number of events:  $n = 129$ ) and  $1,214 \pm 136$  ms ( $n = 130$ ), respectively. The applied transmembrane potential was +15 mV. The other experimental conditions were stated in the caption of **Fig. 1c**.

**(xii) Analyses of the kinetic rate constants in homogeneous (FBS-free) and heterogeneous (FBS) solutions.**

**Table S1.** The release ( $\tau_{\text{on}}$ ) and capture ( $\tau_{\text{off}}$ ) durations, as well as the association ( $k_{\text{on}}$ ) and dissociation ( $k_{\text{off}}$ ) rate constants determined at various protein analyte concentrations ([Bs]). The applied transmembrane potential was +15 mV. These data points were used to construct panels of **Fig. 1h**. They represent mean  $\pm$  s.d. over a number of  $n$  distinct experiments.  $n$  is listed on the first column of the table (*left side*). The other experimental conditions were the same as those indicated in the caption of **Fig. 1**.

| n | [Bs]   | $\tau_{\text{on}}$ (ms) | $\tau_{\text{off}}$ (ms) | $k_{\text{on}} \times 10^{-7}$ ( $\text{M}^{-1}\text{s}^{-1}$ ) | $k_{\text{off}}$ ( $\text{s}^{-1}$ ) |
|---|--------|-------------------------|--------------------------|-----------------------------------------------------------------|--------------------------------------|
| 5 | 12.63  | $4339 \pm 764$          | $1075 \pm 249$           | $1.87 \pm 0.3$                                                  | $0.98 \pm 0.27$                      |
| 3 | 25.25  | $2398 \pm 1141$         | $1070 \pm 105$           | $2.00 \pm 1.1$                                                  | $0.94 \pm 0.09$                      |
| 3 | 50.5   | $1608 \pm 268$          | $1049 \pm 173$           | $1.26 \pm 0.22$                                                 | $0.97 \pm 0.16$                      |
| 4 | 100.01 | $671 \pm 260$           | $1122 \pm 156$           | $1.64 \pm 0.59$                                                 | $0.91 \pm 0.13$                      |

**Table S2.** Table illustrating the association and dissociation rate constants determined in the absence (-) and presence (+) of 5% (v/v) FBS. The applied transmembrane potential was +15 mV. The equilibrium dissociation constant,  $K_d$ , was  $k_{\text{off}}/k_{\text{on}}$ . Values show mean  $\pm$  s.e.m. from the curve fit of **Fig. 1h**. The other experimental conditions were the same as those stated in the main text in **Fig. 1**.

| FBS | $k_{\text{on}} \times 10^{-7}$ ( $\text{M}^{-1}\text{s}^{-1}$ ) | $k_{\text{off}}$ ( $\text{s}^{-1}$ ) | $K_d$ (nM) |
|-----|-----------------------------------------------------------------|--------------------------------------|------------|
| -   | $1.59 \pm 0.08$                                                 | $0.95 \pm 0.02$                      | $60 \pm 4$ |
| +   | $1.67 \pm 0.09$                                                 | $0.86 \pm 0.03$                      | $52 \pm 3$ |

(xiii) Other pieces of supporting information.

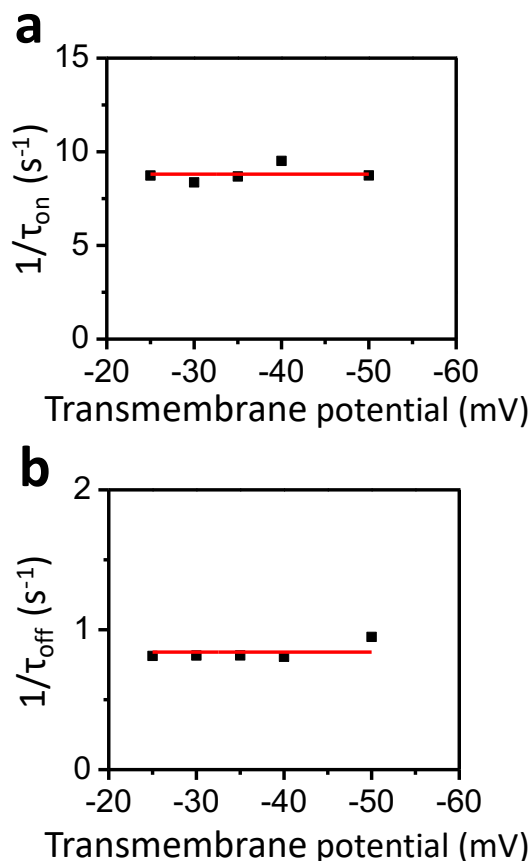

**Figure S8:** Voltage dependence of the Bn-Bs interactions using OBN(GGS)<sub>2</sub>t-FhuA. Plots show the reciprocals of the association (a) and dissociation (b) rates constants. The flatness of both plots indicate that the recorded Bn-Bs interactions were voltage independent. These single-channel electrical recordings were conducted at a concentration of 627.2 nM Bs. The other experimental conditions were the same as those stated in the caption of Fig. 1b. This plot resulted from data acquisition of a single experiment.

**Table S3.** The release ( $\tau_{on}$ ) and capture ( $\tau_{off}$ ) durations, as well as the association ( $k_{on}$ ) and dissociation ( $k_{off}$ ) rate constants determined at various protein analyte concentrations ([Bs]) and in the presence of 5% (v/v) FBS. The applied transmembrane potential was +15 mV. These data points were used to construct panels of Fig. 2e. They represent mean  $\pm$  s.d. over a number of n distinct experiments. n is listed on the first column of the table (left side). The other experimental conditions were the same as those indicated in the caption of Fig. 2.

| n | [Bs]   | $\tau_{on}$ (ms) | $\tau_{off}$ (ms) | $K_{on} * 10^{-7}$ (M <sup>-1</sup> s <sup>-1</sup> ) | $K_{off}$ (s <sup>-1</sup> ) |
|---|--------|------------------|-------------------|-------------------------------------------------------|------------------------------|
| 3 | 12.63  | 4283 $\pm$ 311   | 1170 $\pm$ 81     | 1.86 $\pm$ 0.14                                       | 0.86 $\pm$ 0.06              |
| 3 | 25.25  | 2888 $\pm$ 439   | 1242 $\pm$ 55     | 1.39 $\pm$ 0.19                                       | 0.81 $\pm$ 0.04              |
| 3 | 50.5   | 1573 $\pm$ 469   | 1214 $\pm$ 22     | 1.33 $\pm$ 0.38                                       | 0.82 $\pm$ 0.02              |
| 3 | 100.01 | 577 $\pm$ 118    | 1051 $\pm$ 111    | 1.76 $\pm$ 0.32                                       | 0.96 $\pm$ 0.09              |

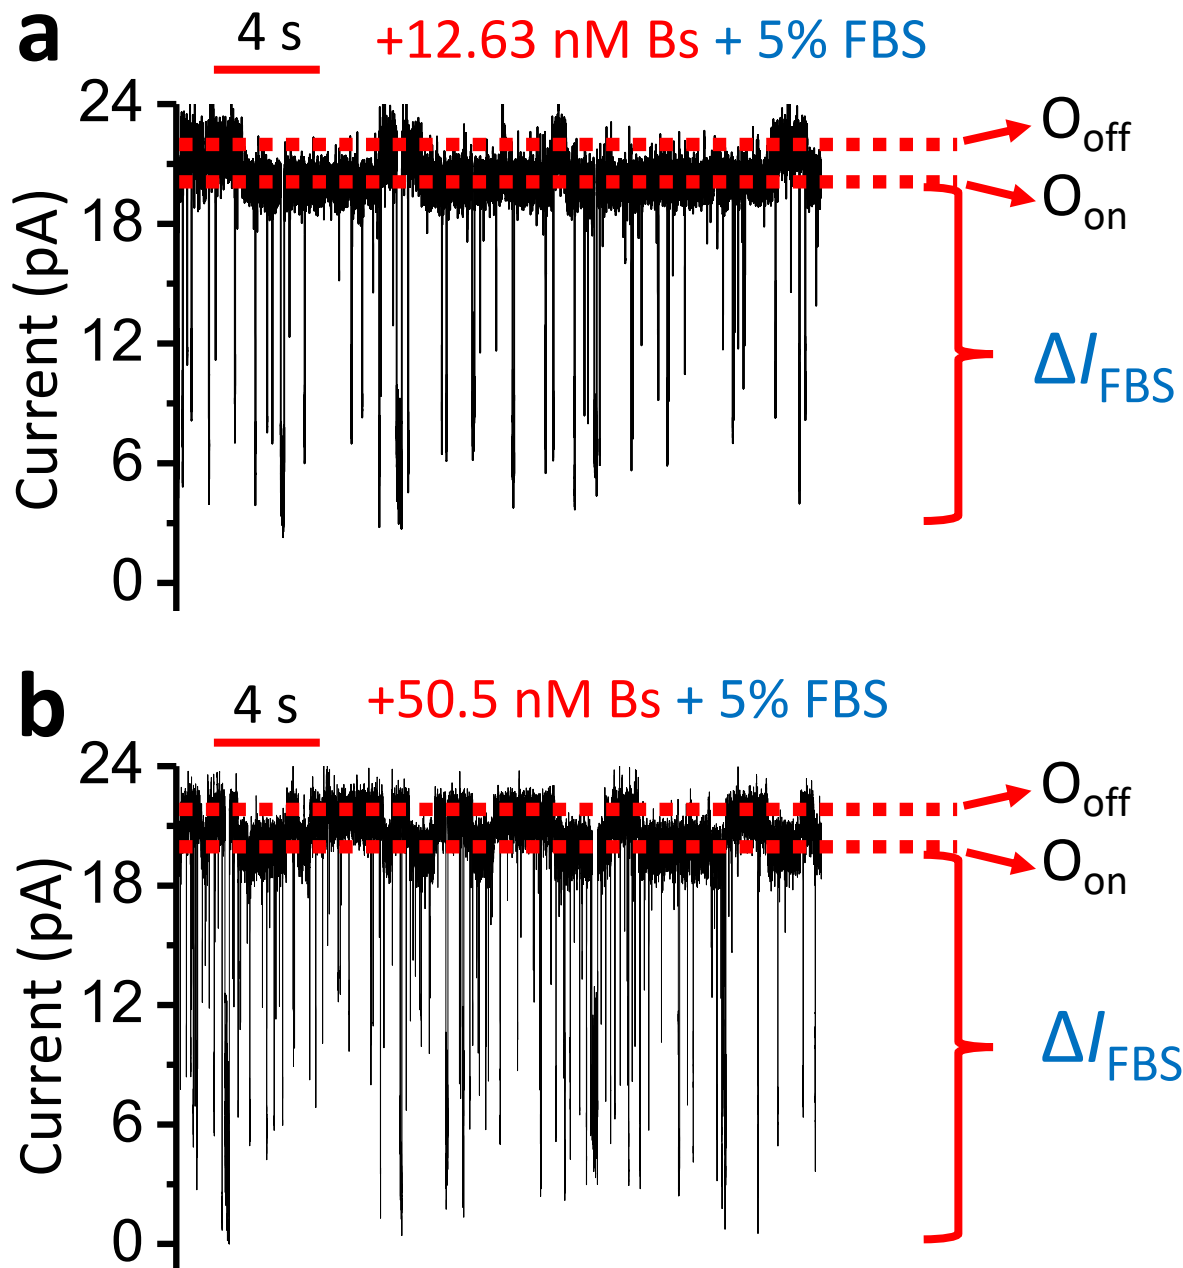

**Figure S9:** Representative single-channel electrical recordings of OBn(GGS)<sub>2</sub>t-FhuA in the presence of 5% (v/v) FBS, as well as 12.63 nM Bs (a) and 50.5 nM Bs (b). The transmembrane potential was +15 mV. Both single-channel electrical traces were further low-pass 8-pole Bessel filtered at 500 Hz. Single-channel electrical signatures shown in (a) and (b) were replicated in  $n = 3$  independent experiments. The other experimental conditions were the same as those stated in the caption of Fig. 1b.

**Table S4. Fitting results for Figure 2f at 12.63 nM Bs added to the *cis* side.** The *cis* side of the chamber also contained 5% (v/v) FBS.

| Type | <i>P</i>          | $\tau_{\text{off}}$ (ms) |
|------|-------------------|--------------------------|
| 1    | $0.502 \pm 0.090$ | $1.53 \pm 0.18$          |
| 2    | $0.343 \pm 0.130$ | $7.79 \pm 0.55$          |
| 3    | $0.134 \pm 0.140$ | $30.4 \pm 1.2$           |
| 4    | $0.021 \pm 0.063$ | $199 \pm 4$              |

Values are mean  $\pm$  s.e.m. The other experimental conditions were the same as those stated in the caption of **Fig. 2b**.

**Table S5. Fitting results for Figure 2f at 50.5 nM Bs added to the *cis* side.** The *cis* side of the chamber also contained 5% (v/v) FBS.

| Type | <i>P</i>          | $\tau_{\text{off}}$ (ms) |
|------|-------------------|--------------------------|
| 1    | $0.525 \pm 0.084$ | $1.62 \pm 0.16$          |
| 2    | $0.309 \pm 0.082$ | $7.91 \pm 0.46$          |
| 3    | $0.146 \pm 0.085$ | $37.9 \pm 0.7$           |
| 4    | $0.021 \pm 0.040$ | $355 \pm 27$             |

Values are mean  $\pm$  s.e.m. The other experimental conditions were the same as those stated in the caption of **Fig. 2b**.

The dwell times of the four FBS-induced events at 5% (v/v) FBS were the following (mean  $\pm$  s.e.m.; n=3):  $\tau_{\text{off-1}} = 1.4 \pm 0.1$  ms,  $\tau_{\text{off-2}} = 7.4 \pm 0.2$  ms,  $\tau_{\text{off-3}} = 34.7 \pm 2.2$  ms, and  $\tau_{\text{off-4}} = 282 \pm 30$  ms with their corresponding probabilities  $P_1 = 0.51 \pm 0.03$ ,  $P_2 = 0.31 \pm 0.01$ ,  $P_3 = 0.14 \pm 0.01$ , and  $P_4 = 0.02 \pm 0.01$ , respectively (**Fig. 2g; Supporting Information, Tables S6-S9**).

**Table S6. Event probability, inter-event duration, dwell time, and event frequency of FBS-induced current blockades in the presence of 12.63 nM Bs.** These experiments were conducted using 5% (v/v) FBS.

| Event type | <i>P</i>          | $\tau_{\text{on}}$ (ms) | $\tau_{\text{off}}$ (ms) | <i>f</i> (s <sup>-1</sup> ) |
|------------|-------------------|-------------------------|--------------------------|-----------------------------|
| 1          | $0.472 \pm 0.034$ | 221 $\pm$ 83            | $1.37 \pm 0.21$          | $2.138 \pm 0.633$           |
| 2          | $0.324 \pm 0.059$ |                         | $7.50 \pm 0.50$          | $1.436 \pm 0.370$           |
| 3          | $0.156 \pm 0.020$ |                         | $33.7 \pm 5.2$           | $0.692 \pm 0.126$           |
| 4          | $0.048 \pm 0.040$ |                         | $235 \pm 54$             | $0.214 \pm 0.190$           |

*P* indicates the event probability. *f* shows the event frequency. Values are mean  $\pm$  s.d. (n=3). The other experimental conditions were the same as those stated in the caption of **Fig. 2b**.

**Table S7. Event probability, inter-event duration, dwell time, and event frequency of FBS-induced current blockades in the presence 25.25 nM Bs.** These experiments were conducted using 5% (v/v) FBS.

| Type | <i>P</i>      | $\tau_{\text{off}}$ (ms) | $\tau_{\text{on}}$ (ms) | <i>f</i> (s <sup>-1</sup> ) |
|------|---------------|--------------------------|-------------------------|-----------------------------|
| 1    | 0.493 ± 0.067 | 1.04 ± 0.22              | 414 ± 134               | 0.941 ± 0.331               |
| 2    | 0.317 ± 0.029 | 6.28 ± 2.59              |                         | 0.603 ± 0.172               |
| 3    | 0.143 ± 0.033 | 32.2 ± 11.0              |                         | 0.287 ± 0.140               |
| 4    | 0.048 ± 0.025 | 319 ± 161                |                         | 0.095 ± 0.058               |

*P* indicates the event probability. *f* shows the event frequency. Values are mean ± s.d. (n=3). The other experimental conditions were the same as those stated in the caption of **Fig. 2b**.

**Table S8. Event probability, inter-event duration, dwell time, and event frequency of FBS-induced current blockades in the presence of 50.48 nM Bs.** These experiments were conducted using 5% (v/v) FBS.

| Type | <i>P</i>      | $\tau_{\text{off}}$ (ms) | $\tau_{\text{on}}$ (ms) | <i>f</i> (s <sup>-1</sup> ) |
|------|---------------|--------------------------|-------------------------|-----------------------------|
| 1    | 0.567 ± 0.038 | 1.25 ± 0.41              | 362 ± 296               | 2.220 ± 2.243               |
| 2    | 0.241 ± 0.093 | 7.08 ± 0.87              |                         | 1.193 ± 1.423               |
| 3    | 0.124 ± 0.028 | 36.2 ± 14.1              |                         | 0.555 ± 0.668               |
| 4    | 0.068 ± 0.057 | 354 ± 117                |                         | 0.143 ± 0.038               |

*P* indicates the event probability. *f* shows the event frequency. Values are mean ± s.d. (n=3). The other experimental conditions were the same as those stated in the caption of **Fig. 2b**.

**Table S9. Event probability, inter-event duration, dwell time, and event frequency of FBS-induced current blockades in the presence of 100.91 nM Bs.** These experiments were conducted using 5% (v/v) FBS.

| Type | <i>P</i>      | $\tau_{\text{off}}$ (ms) | $\tau_{\text{on}}$ (ms) | <i>f</i> (s <sup>-1</sup> ) |
|------|---------------|--------------------------|-------------------------|-----------------------------|
| 1    | 0.551 ± 0.083 | 1.59 ± 0.25              | 161 ± 44                | 2.816 ± 0.626               |
| 2    | 0.319 ± 0.040 | 7.72 ± 0.89              |                         | 1.705 ± 0.674               |
| 3    | 0.116 ± 0.045 | 44.6 ± 13.7              |                         | 0.623 ± 0.311               |
| 4    | 0.013 ± 0.004 | 373 ± 125                |                         | 0.073 ± 0.043               |

*P* indicates the event probability. *f* shows the event frequency. Values are mean ± s.d. (n=3). The other experimental conditions were the same as those stated in the caption of **Fig. 2b**.

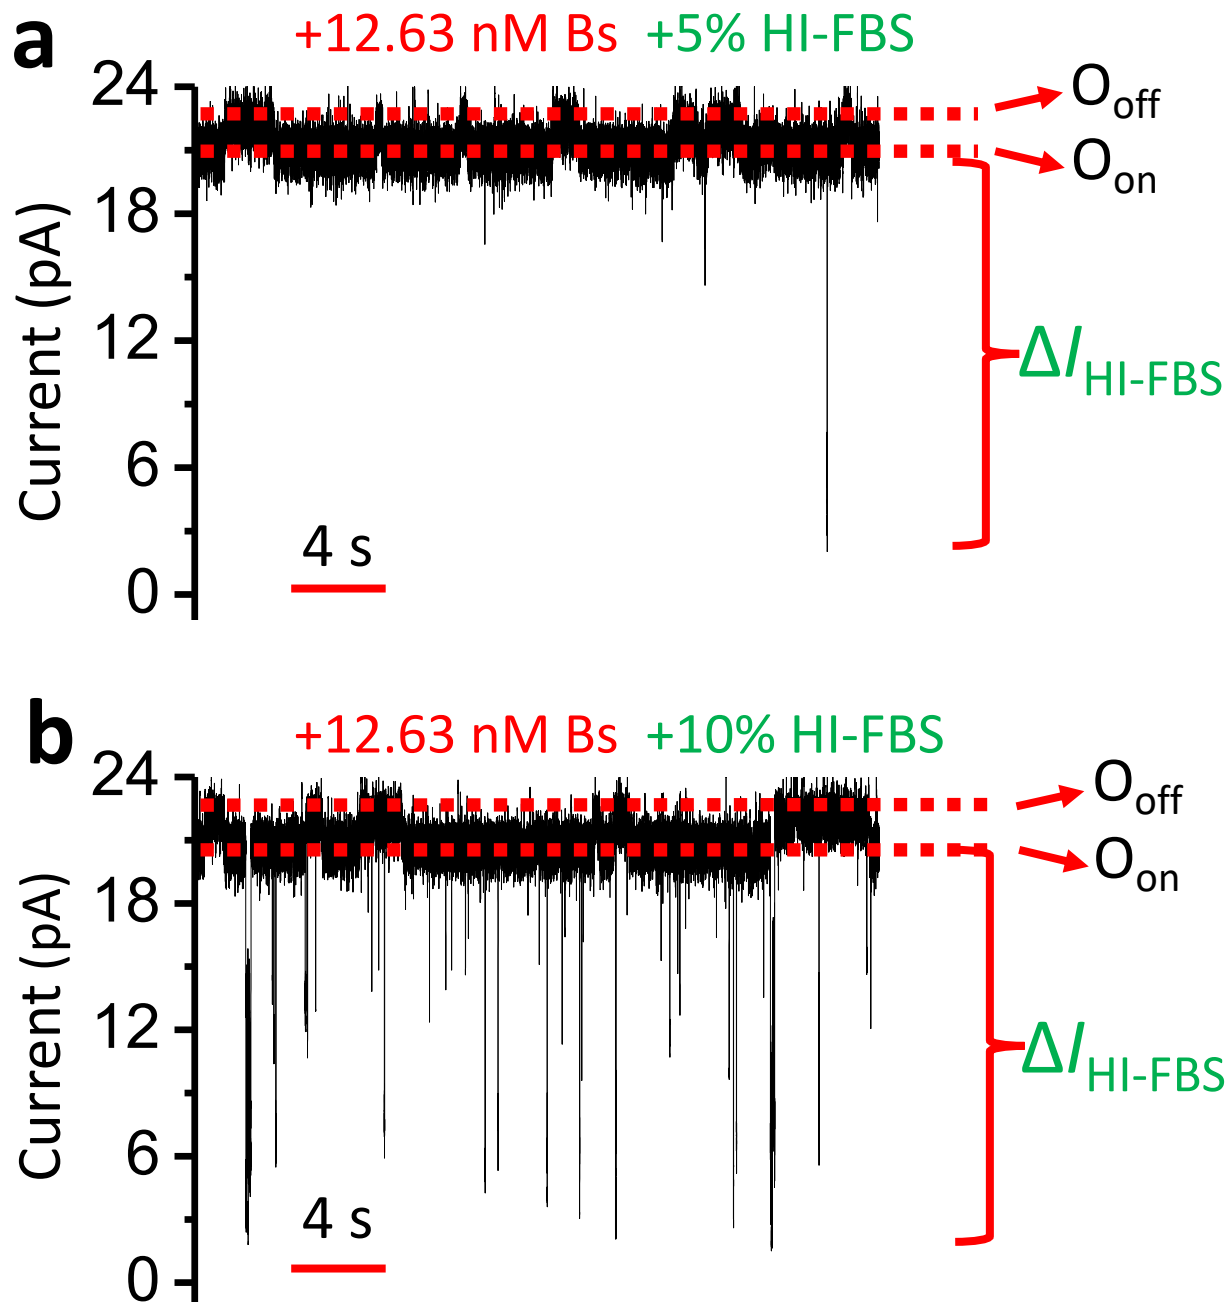

**Figure S10:** Representative single-channel electrical recordings of OBn(GGS)<sub>2</sub>t-FhuA in the presence of 12.63 nM Bs, as well as 5% (v/v) HI-FBS (a) and 10% (v/v) HI-FBS (b). The applied transmembrane potential was +15 mV. Both single-channel electrical traces were further low-pass 8-pole Bessel filtered at 500 Hz. Single-channel electrical signatures shown in (a) and (b) were replicated in  $n = 3$  independent experiments. The other experimental conditions were the same as those stated in the caption of Fig. 2b.

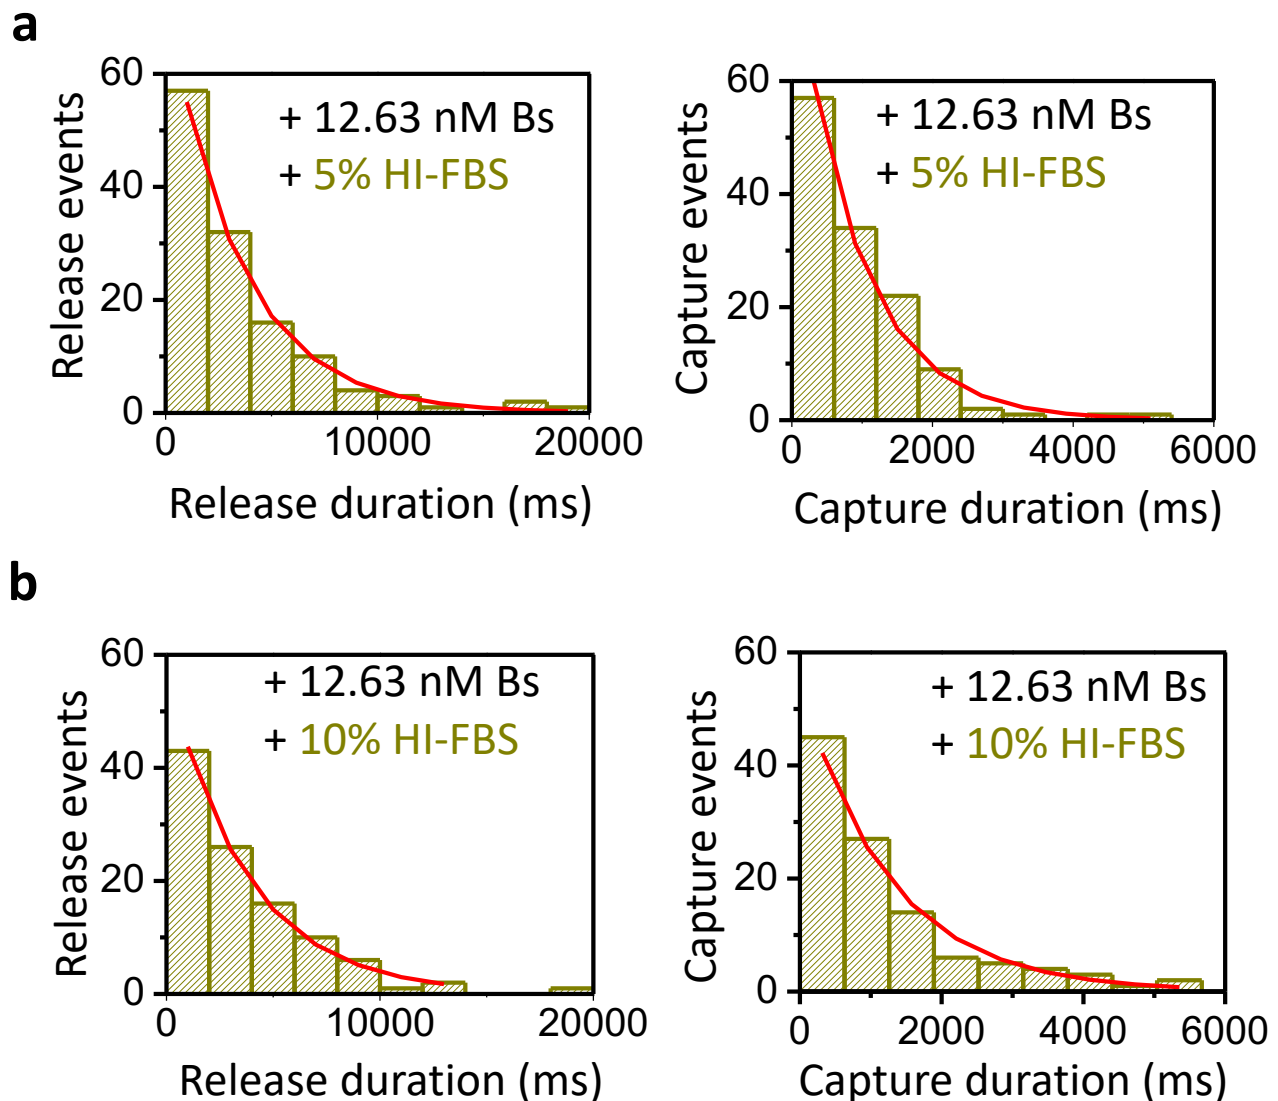

**Figure S11: Standard capture and release event histograms in HI-FBS.** (a) Representative standard histograms of the release ( $\tau_{\text{on}}$ ; left) and capture durations ( $\tau_{\text{off}}$ ; right) in 5% (v/v) HI-FBS and at a concentration of 12.63 nM Bs. The  $\tau_{\text{on}}$  and  $\tau_{\text{off}}$  values obtained from the fits, in the form of mean  $\pm$  s.e.m., were  $3,434 \pm 132$  ms (number of events:  $n = 126$ ) and  $909 \pm 78$  ms ( $n = 128$ ), respectively. (b) Representative standard histograms of the release ( $\tau_{\text{on}}$ ; left) and capture duration ( $\tau_{\text{off}}$ ; right) of the reversible Bs captures recorded in 10% (v/v) HI-FBS and at a concentration of 12.63 nM Bs. The  $\tau_{\text{on}}$  and  $\tau_{\text{off}}$  values obtained from the fits, in the form of mean  $\pm$  s.e.m., were  $3,719 \pm 174$  ms (number of events:  $n = 106$ ) and  $1,257 \pm 91$  ms ( $n = 107$ ), respectively.

**Table S10.** The release ( $\tau_{on}$ ) and capture ( $\tau_{off}$ ) durations, as well as the association ( $k_{on}$ ) and dissociation ( $k_{off}$ ) rate constants determined at 12.63 nM Bs and in the presence of 5% (v/v) HI-FBS, 10% (v/v) HI-FBS, or 20% (v/v) HI-FBS. The applied transmembrane potential was +15 mV. These data points were used to construct panels of Fig. 3d. They represent mean  $\pm$  s.d. over a number of n distinct experiments. n is listed on the first column of the table (*left side*). The other experimental conditions were the same as those indicated in the caption of Fig. 3.

| n | HI-FBS (%) (v/v) | $\tau_{on}$ (ms) | $\tau_{off}$ (ms) | $k_{on} \times 10^{-7}$ (M <sup>-1</sup> s <sup>-1</sup> ) | $k_{off}$ (s <sup>-1</sup> ) |
|---|------------------|------------------|-------------------|------------------------------------------------------------|------------------------------|
| 3 | 5                | 3990 $\pm$ 539   | 1022 $\pm$ 343    | 2.01 $\pm$ 0.28                                            | 1.05 $\pm$ 0.32              |
| 3 | 10               | 4180 $\pm$ 428   | 1195 $\pm$ 252    | 1.91 $\pm$ 0.20                                            | 0.84 $\pm$ 0.18              |
| 3 | 20               | 4881 $\pm$ 519   | 1071 $\pm$ 108    | 1.63 $\pm$ 0.17                                            | 0.93 $\pm$ 0.09              |

**Table S11.** Event probability, inter-event duration, dwell time, and event frequency of HI-FBS-induced current blockades in the presence of 12.63 nM Bs. These experiments were conducted using 5% (v/v) HI-FBS.

| Type | $P$               | $\tau_{off}$ (ms) | $\tau_{on}$ (ms) | $f$ (s <sup>-1</sup> ) |
|------|-------------------|-------------------|------------------|------------------------|
| 1    | 0.842 $\pm$ 0.083 | 0.42 $\pm$ 0.12   | 7940 $\pm$ 2231  | 0.114 $\pm$ 0.030      |
| 3    | 0.159 $\pm$ 0.083 | 15.4 $\pm$ 6.5    |                  | 0.024 $\pm$ 0.020      |

Values are mean  $\pm$  s.d. (n=3). The other experimental conditions were the same as those stated in the caption of Fig. 3.

**Table S12.** Event probability, inter-event duration, dwell time, and event frequency of HI-FBS-induced current blockades in the presence of 12.63 nM Bs. These experiments were conducted using 10% (v/v) HI-FBS.

| Type | $P$               | $\tau_{off}$ (ms) | $\tau_{on}$ (ms) | $f$ (s <sup>-1</sup> ) |
|------|-------------------|-------------------|------------------|------------------------|
| 1    | 0.601 $\pm$ 0.077 | 1.15 $\pm$ 0.08   | 576 $\pm$ 167    | 0.823 $\pm$ 0.129      |
| 2    | 0.246 $\pm$ 0.076 | 7.5 $\pm$ 4.1     |                  | 0.3602 $\pm$ 0.208     |
| 3    | 0.111 $\pm$ 0.026 | 41.7 $\pm$ 25     |                  | 0.161 $\pm$ 0.074      |
| 4    | 0.042 $\pm$ 0.015 | 428 $\pm$ 347     |                  | 0.056 $\pm$ 0.018      |

Values are mean  $\pm$  s.d. (n=3). The other experimental conditions were the same as those stated in the caption of Fig. 3.



**Table S13. Event probability, inter-event duration, dwell time, and event frequency of HI-FBS-induced current blockades in the presence of 12.63 nM Bs.** These experiments were conducted using 20% (v/v) HI-FBS.

| Type | <i>P</i>      | $\tau_{\text{off}}$ (ms) | $\tau_{\text{on}}$ (ms) | <i>f</i> (s <sup>-1</sup> ) |
|------|---------------|--------------------------|-------------------------|-----------------------------|
| 1    | 0.670 ± 0.083 | 1.45 ± 0.42              | 358 ± 41                | 1.428 ± 0.353               |
| 2    | 0.217 ± 0.063 | 7.50 ± 5.12              |                         | 0.448 ± 0.088               |
| 3    | 0.081 ± 0.019 | 50.5 ± 30.0              |                         | 0.170 ± 0.036               |
| 4    | 0.033 ± 0.024 | 444 ± 330                |                         | 0.067 ± 0.043               |

Values are mean ± s.d. (n=3). The other experimental conditions were the same as those stated in the caption of **Fig. 3**.

### SUPPORTING REFERENCES

1. Thakur, A. K.; Movileanu, L., Real-Time Measurement of Protein-Protein Interactions at Single-Molecule Resolution using a Biological Nanopore. *Nat. Biotechnol.* **2019**, *37* (1), 96-101.
2. Schreiber, G.; Fersht, A. R., Interaction of barnase with its polypeptide inhibitor barstar studied by protein engineering. *Biochemistry* **1993**, *32* (19), 5145-5150.
3. Schreiber, G.; Fersht, A. R., Energetics of protein-protein interactions: analysis of the barnase-barstar interface by single mutations and double mutant cycles. *J. Mol. Biol.* **1995**, *248* (2), 478-486.
4. Guillet, V.; Laphorn, A.; Hartley, R. W.; Manguen, Y., Recognition between a bacterial ribonuclease, barnase, and its natural inhibitor, barstar. *Structure* **1993**, *1* (3), 165-76.
5. Thakur, A. K.; Larimi, M. G.; Gooden, K.; Movileanu, L., Aberrantly Large Single-Channel Conductance of Polyhistidine Arm-Containing Protein Nanopores. *Biochemistry* **2017**, *56* (36), 4895-4905.
6. Mohammad, M. M.; Howard, K. R.; Movileanu, L., Redesign of a plugged beta-barrel membrane protein. *J. Biol. Chem.* **2011**, *286* (10), 8000-8013.
7. Larimi, M. G.; Mayse, L. A.; Movileanu, L., Interactions of a Polypeptide with a Protein Nanopore Under Crowding Conditions. *ACS nano* **2019**, *13* (4), 4469-4477.
8. Couoh-Cardel, S.; Hsueh, Y. C.; Wilkens, S.; Movileanu, L., Yeast V-ATPase Proteolipid Ring Acts as a Large-conductance Transmembrane Protein Pore. *Sci. Rep.* **2016**, *6*, 24774.
9. Simon, J.; Muller, J.; Ghazaryan, A.; Morsbach, S.; Mailander, V.; Landfester, K., Protein denaturation caused by heat inactivation detrimentally affects biomolecular corona formation and cellular uptake. *Nanoscale* **2018**, *10* (45), 21096-21105.
10. Soltis, R. D.; Hasz, D.; Morris, M. J.; Wilson, I. D., The effect of heat inactivation of serum on aggregation of immunoglobulins. *Immunology* **1979**, *36* (1), 37-45.
